# Supplementary material
Source: publisher figshare collection journal article supplement (https://sage.figshare.com/ndownloader/files/21208167)
Supplement: Supplementary file [file 21208167]

***Embolization of visceral arterial aneurysms:  
simulation with 3D-printed models***

**Type of manuscript;**

Technical article

**Author;**

Eisuke Shibata<sup>1</sup>, Hidemasa Takao<sup>1</sup>, Shiori Amemiya<sup>1</sup>, Kuni Ohtomo<sup>1,2</sup>,

Osamu Abe<sup>1</sup>

1) Department of Radiology, The University of Tokyo, Graduate School of Medicine,

7-3-1 Hongo, Bunkyo-ku, Tokyo 113-8655, Japan

2) International University of Health and Welfare, 2600-1, Kitakanemaru, Ohtawara,

Tochigi 324-8501, Japan

**Acknowledgment of grant support;**

This work was supported by a Grant-in-Aid for Scientific Research (A) 15H02553

from Japan Society for the Promotion of Science.

Kojimachi Business Center Building, 5-3-1 Kojimachi, Chiyoda-ku, Tokyo 102-0083

Telephone: +81-3-3263-1722

**Full list of declarations;**

All authors declared that they had no interest of conflict.

**Corresponding author;**

Eisuke Shibata

Department of Radiology, the University of Tokyo, Graduate School of Medicine, 7-3-1

Hongo, Bunkyo-ku, Tokyo 113-8655, Japan

Email: [eisuke.shibata1130@gmail.com](mailto:eisuke.shibata1130@gmail.com)

Telephone: +81-3-3815-5411

Fax: +81-3-5800-8630
